# Supplementary material for: A core–shell MnO2@Au nanofiber network as a high-performance flexible transparent supercapacitor electrode
Source: Royal Society of Chemistry journal article supplement (doi:10.1039/c9ta00778d), 2019-01-01
Supplement: c9ta00778d1.pdf [file c9ta00778d1.pdf]

## Supplementary Information

### Core-shell MnO<sub>2</sub>@Au Nanofibers Network as High-Performance Flexible Transparent Supercapacitor Electrode

Soram Bobby Singh<sup>a</sup>, Thangjam Ibomcha Singh<sup>a</sup>, Nam Hoon Kim<sup>a</sup>, Joong Hee Lee<sup>a, b, \*</sup>

<sup>a</sup>*Advanced Materials Institute of BIN Convergence Technology (BK21 plus Global) and Department of BIN Convergence Technology, Chonbuk National University, Jeonju, Jeonbuk, 54896, Republic of Korea*

<sup>b</sup>*Carbon Composite Research Centre, Department of Polymer-Nano Science and Technology, Chonbuk National University, Jeonju, Jeonbuk 54896, Republic of Korea.*

*\*Corresponding author: e-Mail: [jhl@chonbuk.ac.kr](mailto:jhl@chonbuk.ac.kr) (Joong Hee Lee)*

## Supplementary Figures

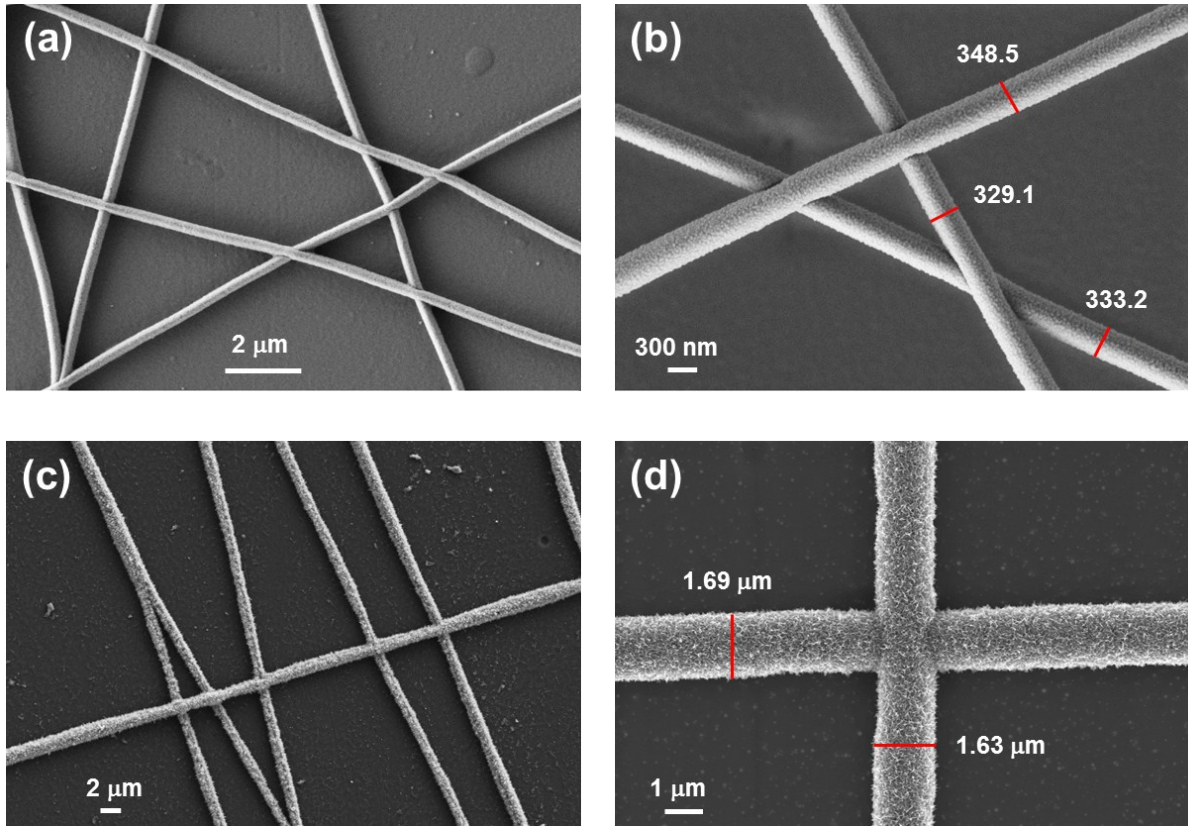

**Fig. S1** (a) FE-SEM photograph of gold coated PVA nanofiber network. (b) Magnified FE-SEM photograph of (a), showing junctionless nanofiber structure with an average nanofiber diameter of ~330 nm. (c) FE-SEM photograph of electrodeposited MnO<sub>2</sub>@AuNFs network electrode (9 min). (d) Magnified FE-SEM of (c) demonstrating a fused MnO<sub>2</sub>@AuNFs network structure with an average diameter of ~1.6 μm.

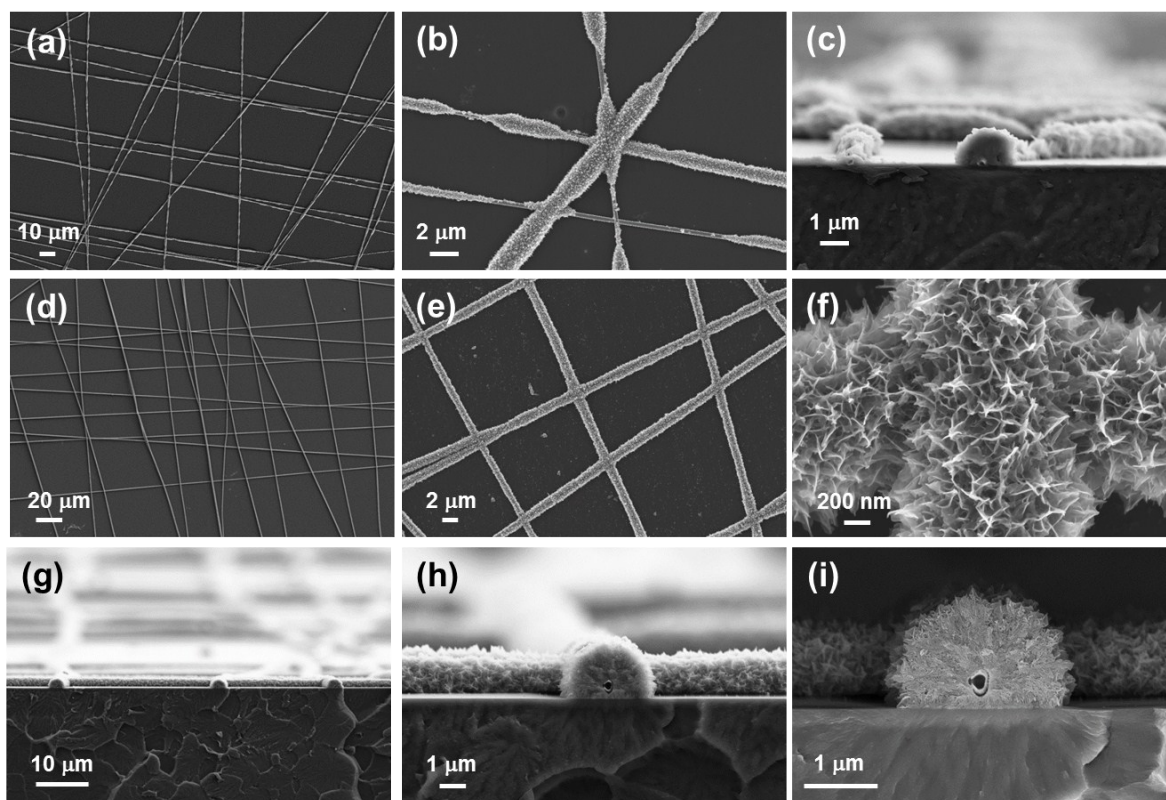

**Fig. S2** FE-SEM photograph of  $\text{MnO}_2@AuNFs$  network electrode on PEN substrates at different electrodeposition time: (a, b) low and magnified FE-SEM of 3 min electrodeposition time  $\text{MnO}_2$  electrode showing non-uniform coating of  $\text{MnO}_2$  over the AuNFs network electrode. (c) Cross-sectional magnified FE-SEM photograph of (a), (d, e) low and magnified FE-SEM photograph of 9 min electrodeposition time suggesting a uniform coating of  $\text{MnO}_2$  over the AuNFs network. (f) Magnified FE-SEM photograph of (e), showing spiky nanosheet  $\text{MnO}_2$  morphology. (g-i) Cross-sectional FE-SEM image at different magnification confirming the formation of core-shell  $\text{MnO}_2@AuNFs$  network electrode structure.

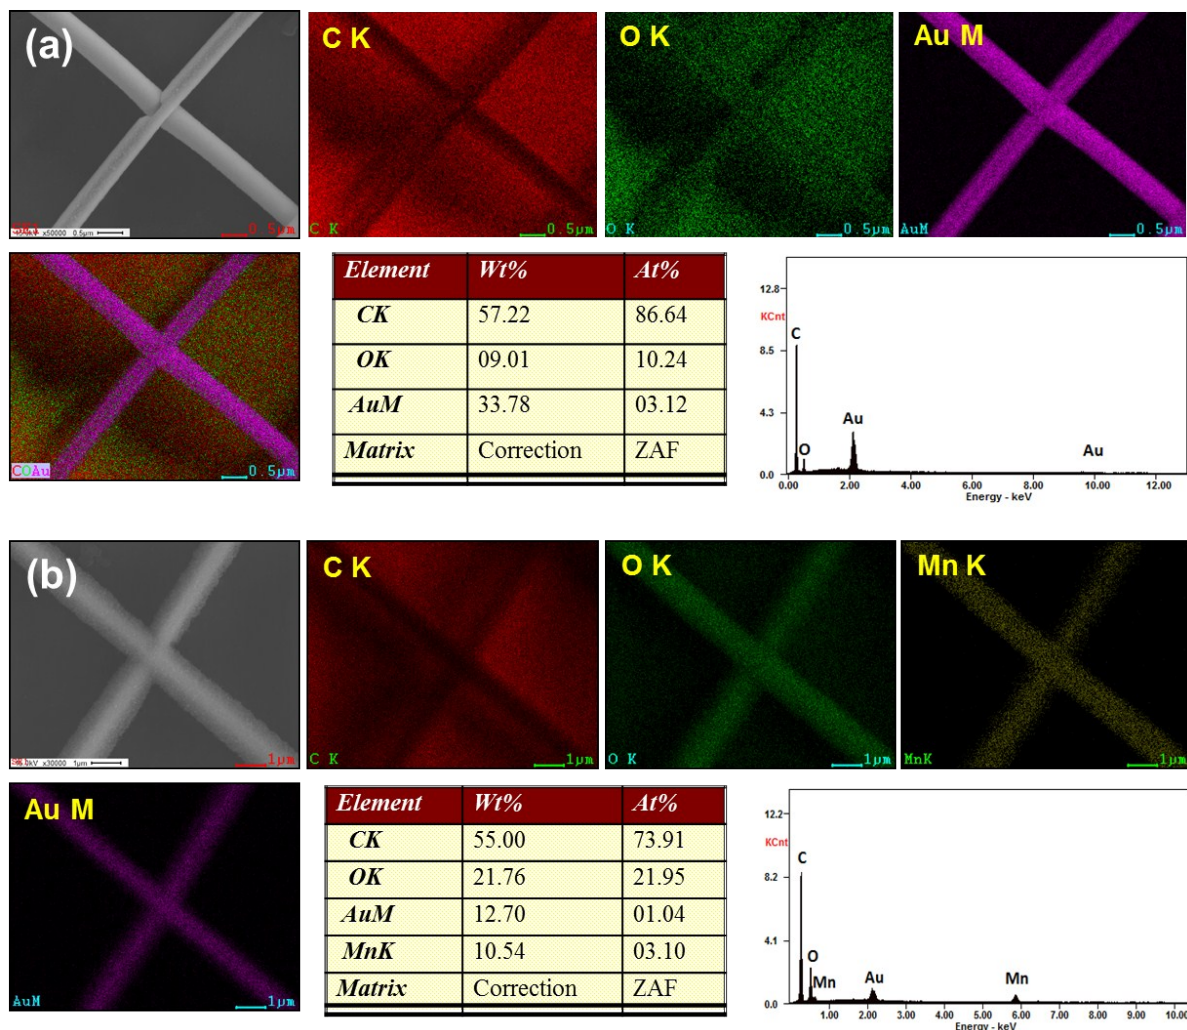

**Fig. S3** Elemental analysis of bare AuNFs and electrodeposited MnO<sub>2</sub>@AuNFs network electrode on PEN substrates. EDS mapping of (a) AuNFs network electrode before MnO<sub>2</sub> electrodeposition and (b) after MnO<sub>2</sub> electrodeposition (9 min).

From the EDS mapping analysis Figure S2 (a), it is quite confirmed that gold is uniformly coated over the PVA nanofiber template by thermal deposition. Again, Figure S2 (b) EDS mapping image of MnO<sub>2</sub>@AuNFs network (9 min) shows the uniform distribution of Mn, O, and Au elements throughout the whole AuNFs area.

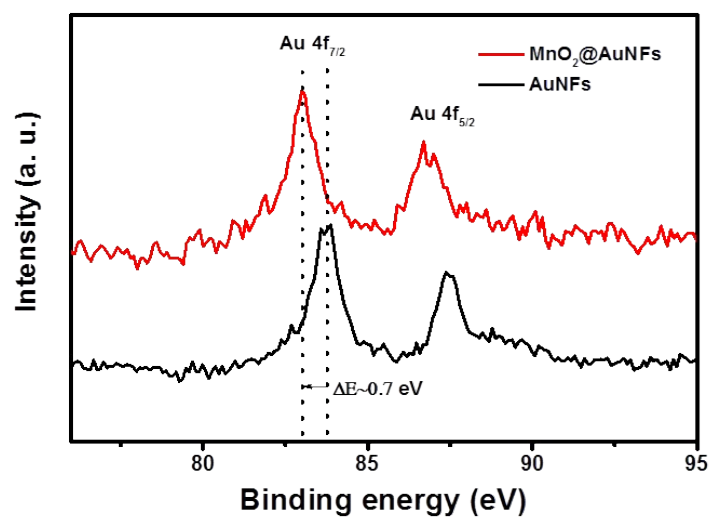

**Fig. S4** Comparison of Au 4f binding energy of the bare AuNFs network electrode and MnO<sub>2</sub>@AuNFs network electrode after electrodeposition. A red shift in the binding energy is clearly observed suggesting a strong interaction between core AuNFs and shell MnO<sub>2</sub> nanosheet.

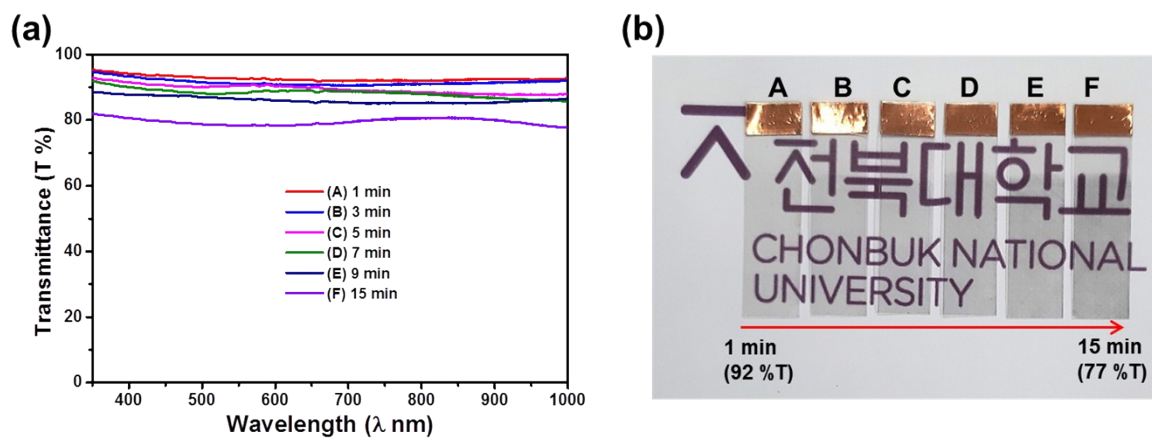

**Fig. S5** (a) Optical transmittance spectra of electrodeposited  $\text{MnO}_2@AuNFs$  network electrode for different electrodeposition time. (b) Digital photographs of  $\text{MnO}_2@AuNFs$  electrode on PEN substrate at different electrodeposition time.

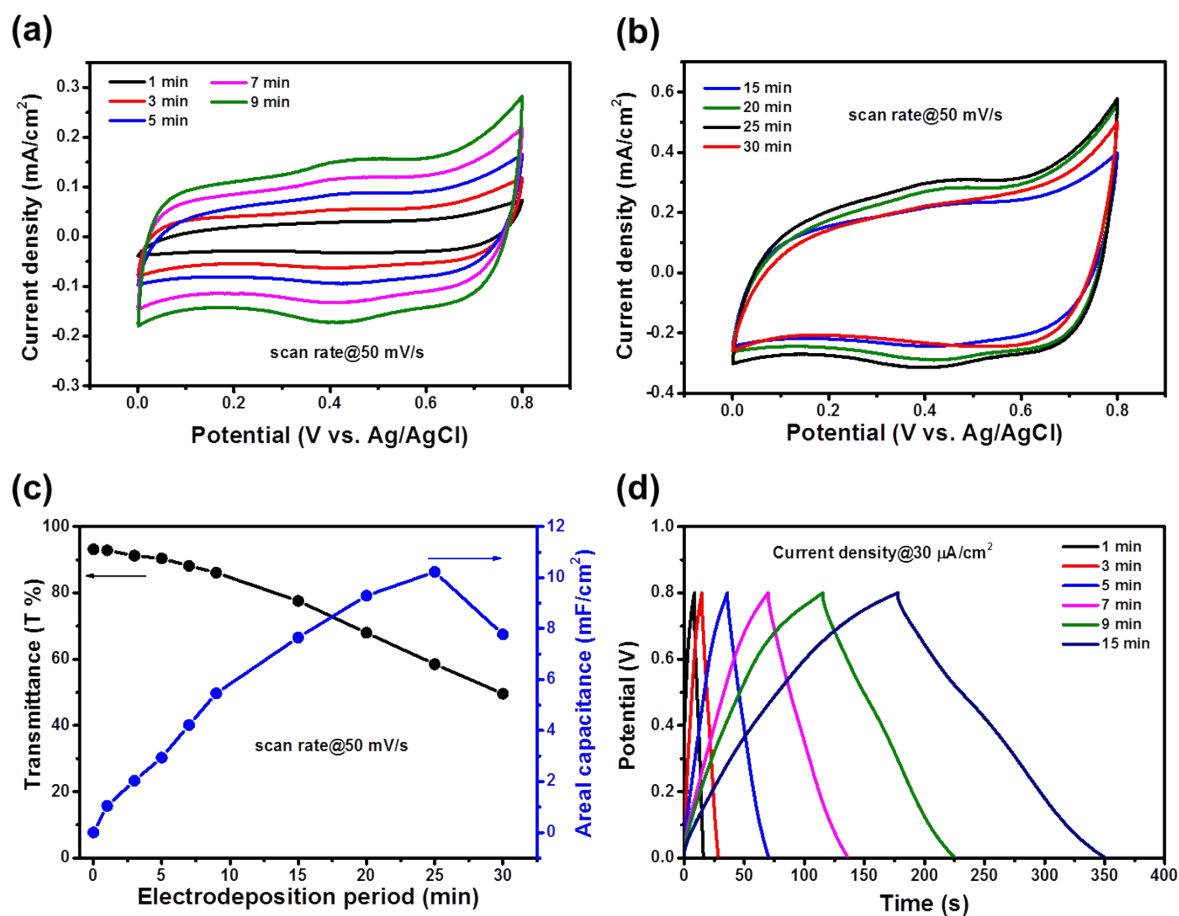

**Fig. S6** Electrochemical measurements of the core-shell MnO<sub>2</sub>@AuNFs network electrode in a three-electrode configuration in 1 M Na<sub>2</sub>SO<sub>4</sub> electrolyte. (a, b) Cyclic voltammograms (CVs) of the electrode with different MnO<sub>2</sub> electrodeposition times at a scan rate of 50 mV/s. (c) Optical transmittance and areal capacitance as a function of MnO<sub>2</sub> electrodeposition time (areal capacitance derived from Fig S5a,b). (d) Cyclic voltammograms (CVs) of the electrode with different MnO<sub>2</sub> electrodeposition times at a scan rate of 50 mV/s. GCD curves of the MnO<sub>2</sub>@AuNFs/PEN electrodes for different MnO<sub>2</sub> electrodeposition time at a current density of 30 μA/cm<sup>2</sup>.

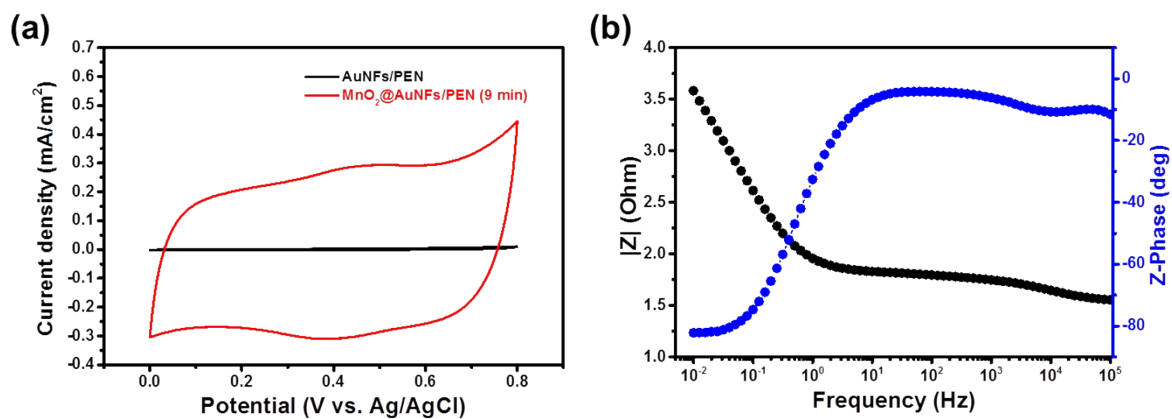

**Fig. S7** (a) Comparison of the CV curves of bare AuNFs/PEN electrode with 9 min electrodeposited MnO<sub>2</sub>@AuNFs/PEN electrode at a scan rate of 100 mV/s. (b) Bode plot, frequency dependent impedance, and phase angles of the MnO<sub>2</sub>@AuNFs network electrode in the frequency range of 0.01 to 100 kHz.



## Calculation of Areal capacitances and Energy densities

In the case of the three-electrode configuration system, the areal capacitance (mF/cm<sup>2</sup>) of the film was derived from the 5th cycle of each CV scan using the following Equation (1)

$$C/A = \frac{1}{\nu A(V_f - V_i)} \int_{V_i}^{V_f} j dV \quad (1)$$

where  $A$  is the effective area of the electrode film ( $A=2 \times 1 \text{ cm}^2$ )

In the case of the two-electrode configuration system, the areal capacitance of the device was calculated based on the area of the device as according to the following Equation (2)

$$C_{device}^{areal} = \frac{1}{\nu A_{device}(V_f - V_i)} \int_{V_i}^{V_f} j dV \quad (2)$$

where  $C_{device}^{areal}$  (in F/cm<sup>2</sup>) refer to the areal capacitance of the device and  $A_{device}$  is the total area (cm<sup>2</sup>) of the conducting electrodes in the device, respectively.

The  $C/A$  (in F/cm<sup>2</sup>) was also calculated from the galvanostatic charge/discharge (GCD) curves using Equation (3)

$$C/A = \frac{I}{A \times (dV/dt)} \quad (3)$$

where  $I$  is the discharge current (A),  $A$  is the total area of the electrodes (cm<sup>2</sup>), and  $dV/dt$  is the slope of the galvanostatic discharge curve.

Energy densities and power densities were calculated using Equation (4) as follows

$$E = \frac{C \times (\Delta V)^2}{2 \times 3600} \quad (4a)$$

$$P = \frac{E}{\Delta t \times 3600} \quad (4b)$$

Where E is the energy density (Wh/cm<sup>2</sup>), C is the areal capacitance (F/cm<sup>2</sup>),  $\Delta V$  is the discharge voltage range (V) and  $\Delta t$  is the discharge time (s)

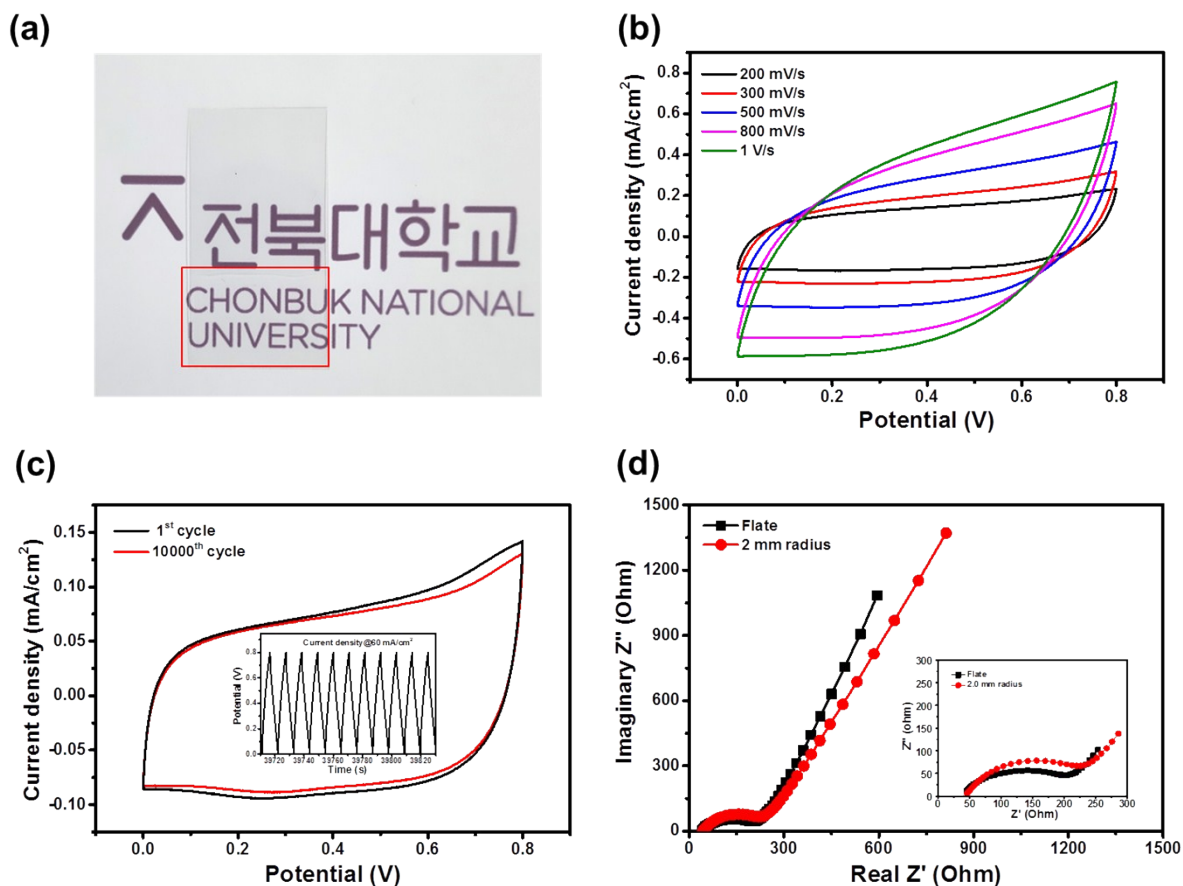

**Fig. S8** (a) Digital photograph of PVA/LiCl gel film coated on a PEN substrate showing its high transparency (gel film: area under red mark). (b) CV curves of  $\text{MnO}_2@AuNFs$  network electrode (9 min) at different scan rate from 200 mV/s to 1 V/s. (c) Comparison of the CV curves of the device at 1<sup>st</sup> and 10,000<sup>th</sup> charge/discharge cycles showing almost 95% retention. (d) Nyquist plot for the supercapacitor devices before and after bending to a radius of 2 mm in the frequency range of (0.1 to 100) kHz.

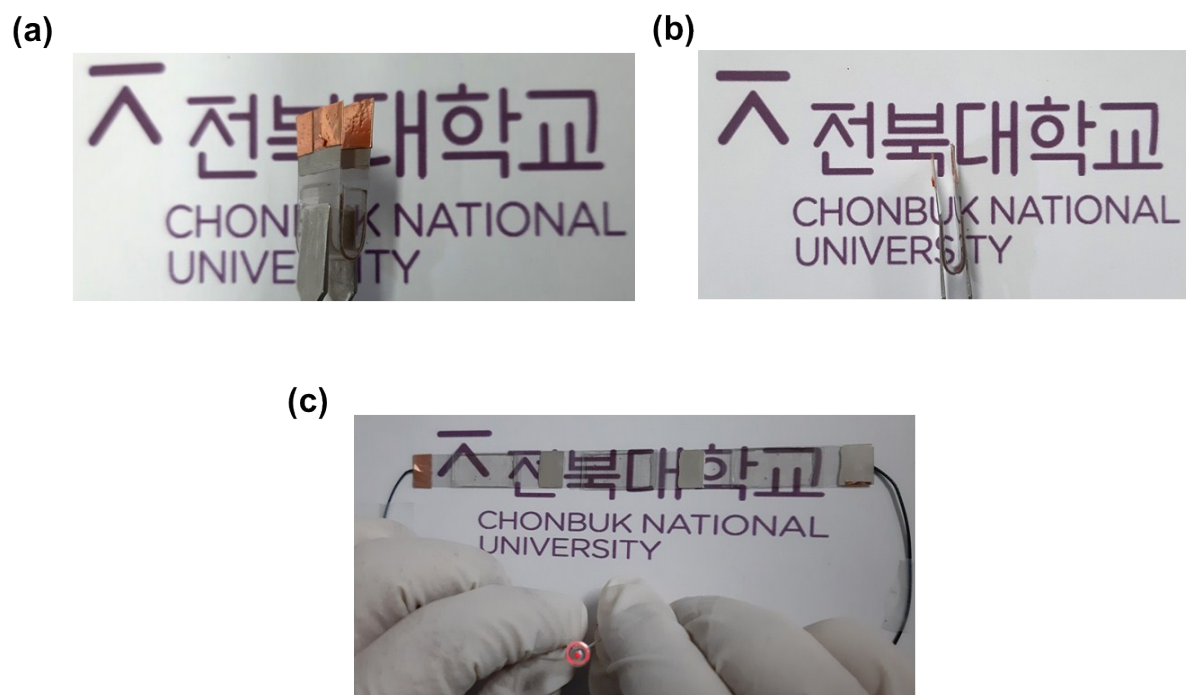

**Fig. S9** (a and b) Digital photographs of a flexible transparent supercapacitor device showing its high bending capability. (c) Digital photograph of a RED LED lamp (1.8 V) powered by three devices connected in a series configuration.

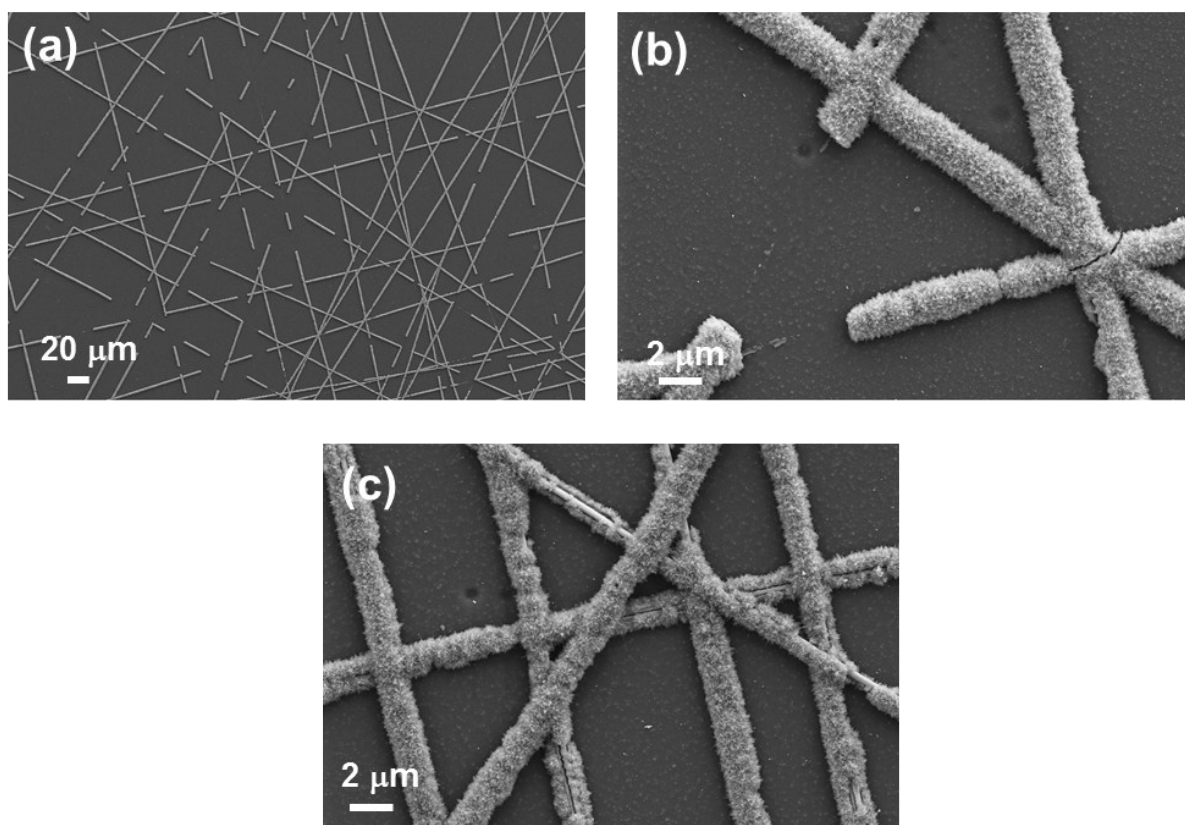

**Fig. S10** (a) Low magnification, (b,c) high magnifications FE-SEM photographs of  $\text{MnO}_2@AuNFs$  network electrode on a PEN substrate, after sonication for 10 min using a 8200H MUJI Ultrasonicator at a frequency of 28 kHz.

It is clearly observed that some  $\text{MnO}_2@AuNFs$  were broken at few places of the network and detachment of  $\text{MnO}_2$  nanosheets from the core AuNFs were observed in some areas of the network indicating the instability of  $\text{MnO}_2@AuNFs$  network electrode under ultrasonication.

**Table S1.** A comparative table showing the areal capacitance and transparency of present work with earlier reported transparent supercapacitors.

| Material                                           | C/A<br>(mF/cm <sup>2</sup> ) | Transmittance<br>(T%) | Reference        |
|----------------------------------------------------|------------------------------|-----------------------|------------------|
| CNF-RGO                                            | 1.730                        | 30                    | [1]              |
| Graphene                                           | 0.101                        | 75                    | [2]              |
| Nanocups                                           | 0.409                        | 71                    | [3]              |
| SWCNT                                              | 0.584                        | 60                    | [4]              |
| Au@MnO <sub>2</sub> supercapacitor device          | 0.795                        | 36                    | [5]              |
| Graphene                                           | 3.3                          | 47                    | [6]              |
| PEDOT:PSS                                          | 1.18                         | 65                    | [7]              |
| Au/MnO <sub>2</sub> network                        | 3.23                         | ~76                   | [8]              |
| GNHC-GF                                            | 5.48                         | 44                    | [9]              |
| Ag/Au/PPy                                          | 0.58                         | 64                    | [10]             |
| RuO <sub>2</sub> /PEDOT supercapacitor device      | 0.84                         | 80                    | [11]             |
| Graphene Q-dot                                     | 0.009                        | 93                    | [12]             |
| Ti <sub>3</sub> C <sub>2</sub> T <sub>x</sub>      | 0.87                         | 80                    | [13]             |
| Embedded Ag Grid electrode                         | 2.79                         | ~81                   | [14]             |
| Embedded Ni mesh/PEDOT:PSS                         | 0.52                         | 83                    | [15]             |
| PEDOT:PSS/Ag grid electrodes                       | 2.84                         | -                     | [16]             |
| MnO <sub>2</sub> @Ni (supercapacitor device)       | 10.6                         | ~80                   | [17]             |
| PEDOT:PSS/AgNWs                                    | 0.6                          | ~51                   | [18]             |
| HTSE film                                          | 3.64                         | ~85                   | [19]             |
| ITO/Co <sub>3</sub> O <sub>4</sub>                 | 6.03                         | 51                    | [20]             |
| In <sub>2</sub> O <sub>3</sub> /SWCNT In sphere    | 0.81                         | 79                    | [21]             |
| MnO <sub>2</sub> /ITO/PET                          | 4.73                         | 44                    | [22]             |
| AgNWs/NiOH/PEDOT:PSS                               | 3.45                         | 86                    | [23]             |
| ITO/Ni@Gr-TF/Fe@Gr-TF                              | 10.9                         | 51                    | [24]             |
| Ag NW/rGO/PANI                                     | 6.4                          | 57                    | [25]             |
| <b>MnO<sub>2</sub>@AuNFs</b>                       | <b>8.26</b>                  | <b>86</b>             | <b>This work</b> |
| <b>MnO<sub>2</sub>@AuNFs supercapacitor device</b> | <b>2.07</b>                  | <b>79</b>             | <b>This work</b> |

**Table S2.** Summary of energy densities and power densities in of our device in comparison with previously reported transparent supercapacitor device.

| Active material                                 | Power density<br>( $\mu\text{W}/\text{cm}^2$ ) | Energy density<br>( $\mu\text{Wh}/\text{cm}^2$ ) | Ref              |
|-------------------------------------------------|------------------------------------------------|--------------------------------------------------|------------------|
| $\text{Ti}_3\text{C}_2\text{T}_x$ (symmetric)   | 0.62                                           | 0.049                                            | [13]             |
|                                                 | 1.24                                           | 0.034                                            |                  |
|                                                 | 2.51                                           | 0.025                                            |                  |
|                                                 | 5.14                                           | 0.02                                             |                  |
|                                                 | 10.91                                          | 0.018                                            |                  |
| PEDOT:PSS                                       | 1.16                                           | 0.009                                            | [11]             |
|                                                 | 1.82                                           | 0.008                                            |                  |
|                                                 | 3.7                                            | 0.008                                            |                  |
|                                                 | 11.76                                          | 0.0079                                           |                  |
|                                                 | 20.92                                          | 0.006                                            |                  |
| $\text{RuO}_2/\text{PEDOT:PSS}$                 | 0.28                                           | 0.015                                            | [11]             |
|                                                 | 1.13                                           | 0.014                                            |                  |
|                                                 | 2.08                                           | 0.014                                            |                  |
|                                                 | 4.83                                           | 0.014                                            |                  |
|                                                 | 19.47                                          | 0.011                                            |                  |
| Graphene Qdot                                   | 0.094                                          | 0.00079                                          | [12]             |
|                                                 | 0.083                                          | 0.00082                                          |                  |
|                                                 | 0.072                                          | 0.00084                                          |                  |
|                                                 | 0.062                                          | 0.00087                                          |                  |
| RMGO                                            | 9                                              | 0.014                                            | [26]             |
| Ag NW/ $\text{Ni}(\text{OH})_2$ -PEIE/PEDOT:PSS | 3.2                                            | 0.074                                            | [23]             |
|                                                 | 4                                              | 0.072                                            |                  |
|                                                 | 6                                              | 0.069                                            |                  |
|                                                 | 12                                             | 0.059                                            |                  |
|                                                 | 20                                             | 0.05                                             |                  |
| $\text{MnO}_2@Au\text{NFs}$                     | <b>4</b>                                       | <b>0.143</b>                                     | <b>This work</b> |
|                                                 | <b>8</b>                                       | <b>0.101</b>                                     |                  |
|                                                 | <b>12</b>                                      | <b>0.078</b>                                     |                  |
|                                                 | <b>16</b>                                      | <b>0.066</b>                                     |                  |
|                                                 | <b>20</b>                                      | <b>0.054</b>                                     |                  |

## Reference

- 1 K. Gao, Z. Shao, X. Wu, X. Wang, Y. Zhang, W. Wang, F. Wang, *Nanoscale*, 2013, **5**, 5307.
- 2 K. Jo, S. Lee, S. M. Kim, J. B. In, S. M. Lee, J. H. Kim, H. J. Lee, K. S. Kim, *Chem. Mater.*, 2015, **27**, 3621.
- 3 H. Y. Jung, M. B. Karimi, M. G. Hahm, P. M. Ajayan, Y. J. Jung, *Sci. Rep.*, 2012, **2**, 773.
- 4 Z. Niu, W. Zhou, J. Chen, G. Feng, H. Li, Y. Hu, W. Ma, H. Dong, J. Li, S. Xie, *Small*, 2013, **9**, 518.
- 5 T. Qiu, B. Luo, M. Giersig, E. M. Akinoglu, L. Hao, X. Wang, L. Shi, M. Jin, L. Zhi, *Small*, 2014, **10**, 4136.
- 6 N. Li, G. Yang, Y. Sun, H. Song, H. Cui, G. Yang, C. Wang, *Nano Lett.*, 2015, **15**, 3195.
- 7 T. Cheng, Y. Z. Zhang, J. D. Zhang, W. Y. Lai, W. Huang, *J. Mater. Chem. A*, 2016, **4**, 10493.
- 8 C. Zhang, T. M. Higgins, S.-H. Park, S. E. O, D. Long, J. N. Coleman, V. Nicolosi, *Nano Energy*, 2016, **28**, 495.
- 9 N. Li, X. Huang, H. Zhang, Z. Shi, C. Wang, *J. Mater. Chem. A*, 2017, **5**, 16803.
- 10 H. Moon, H. Lee, J. Kwon, Y.D. Suh, D.K. Kim, I. Ha, J. Yeo, S. Hong, S.H. Ko, *Sci. Rep.*, 2017, **7**, 41981.
- 11 T. M. Higgins, J. N. Coleman, *ACS Appl. Mater. Interfaces*, 2015, **7**, 16495.
- 12 K. Lee, H. Lee, Y. Shin, Y. Yoon, D. Kim, H. Lee, *Nano Energy*, 2016, **26**, 746.
- 13 C. Zhang, B. Anasori, A. S.-Ascaso, S-H. Park, N. McEvoy, A. Shmeliov, G. S. Duesberg, J. N. Coleman, Y. Gogotsi, and V. Nicolosi, *Adv. Mater.*, 2017, **29**, 1702678.
- 14 J. L. Xu, Y. H. Liu, X. Gao, Y. Sun, S. Shen, X. Cai, L. Chen, and S.D. Wang, *ACS Appl. Mater. Interfaces*, 2017, **9**, 27649.
- 15 Y.-H. Liu, J.-L. Xu, S. Shen, X.-L. Cai, L.-S. Chen and S.-D. Wang, *J. Mater. Chem. A*, 2017, **5**, 9032.
- 16 T. Cheng, Y. Z. Zhang, J-P. Yi, L. Yang, J-D. Zhang, W. Y. Lai, W. Huang, *J. Mater. Chem. A*, 2016, **4**, 13754.
- 17 Y.-H. Liu, J.-L. Xu, X. Gao, Y.-L. Sun, J.-J. Lv, S. Shen, L.-S. Chen and S.-D. Wang, *Energy Environ. Sci.*, 2017, **10**, 2534.
- 18 X. Liu, D. Li, X. Chen, W-Y. Lai, W. Huang, *ACS Appl. Mater. Interfaces*, 2018, **10**, 32536.
- 19 S. B. Singh, T. Kshetria, Th. I. Singh, N. H. Kim, J. H. Lee, *Chemical Engineering Journal*, 2019, **359**, 197.
- 20 X. Liu, Y. Gao, G. Yang, *Nanoscale*, 2016, **8**, 4227.
- 21 P. Chen, G. Shen, *Appl. Phys. Lett.*, 2009, **94**, 043113 1.
- 22 Y. Wang, W. Zhou, Q. Kang, J. Chen, Y. Li, X. Feng, D. Wang, Y. Ma, and W. Huang, *ACS Appl. Mater. Interfaces*, 2018, **10**, 27001.
- 23 R. T. Ginting, M. M. Ovhala, J-W. Kang, *Nano Energy*, 2018, **53**, 650–657
- 24 N. Li, X. Huang, H. Zhang, *J. Alloy. Compd.*, 2017, **712**, 194.
- 25 F. Chen, P. Wan, H. Xu, X. Sun, *ACS Appl. Mater. Interfaces*, 2017, **9**, 17865.
- 26 J. J. Yoo, K. Balakrishnan, J. Huang, V. Meunier, B.G. Sumpter, A. Srivastava, M. Conway, A.L. Mohana Reddy, J. Yu, R. Vajtai, P.M. Ajayan, *Nano Lett.*, 2011, **11**, 1423.
